# Supplementary material for: Do engagement and behavioural mechanisms underpin the effectiveness of the Drink Less app?
Source: Springer Nature journal article supplement (doi:10.1038/s41746-024-01169-7), 2024-06-29
Supplement: 41746_2024_1169_MOESM1_ESM.pdf [file 41746_2024_1169_MOESM1_ESM.pdf]

## Supplementary File 1

- i) What are the trial participants' urges to drink, motivation to drink less and self-regulatory and self-monitoring behaviour at baseline and 6-month follow-up, stratified by group?

Descriptive statistics for the behavioural measures assessed as potential mechanisms of action (urges to drink; motivation to drink less; self-regulatory and self-monitoring behaviour) at both baseline and 6-month follow-up were reported for all participants, and stratified by group (intervention versus comparator). We ran sensitivity analyses where only those participants responding to 6-month follow-up were included in the analytic sample. Supplementary Table 1 shows descriptive statistics of trial participants' potential mechanisms of action at both baseline and 6-month follow-up, overall and stratified by group, with both multiple imputation and complete cases for the missing data at 6-month follow-up data.

- ii) Among participants in the intervention group, how do self-reported adherence, engagement and urges to drink, motivation to drink less, self-regulatory and self-monitoring behaviour differ by sociodemographic and drinking characteristics?

To explore the variation between participants randomised to the intervention group in self-reported adherence, engagement and behavioural characteristics (urges to drink; motivation to drink less; self-regulatory and self-monitoring behaviour) at 6-month follow-up, we reported descriptive statistics for these measures stratified by sociodemographic characteristics and baseline AUDIT scores (grouped into 8-15, 16-19 and 20-40) and COVID-19 measures. We ran sensitivity analyses where only those participants responding to 6-month follow-up were included in the analytic sample.

Self-reported adherence among participants in the intervention group stratified by sociodemographic and drinking characteristics is reported in Supplementary Table 2 (both with multiple imputation and complete cases). Among all participants in the intervention group, their engagement with the Drink Less app is reported in Supplementary Table 3 stratified by sociodemographic and drinking characteristics. Among participants in the intervention group, urges to drink, motivation to drink less, self-regulatory and self-monitoring behaviour are reported in Supplementary Table 4 (using multiple imputation) and Supplementary Table 5 (using complete cases).

- iii) Among participants in the comparator group, how do self-reported adherence and urges to drink, motivation to drink less, self-regulatory and self-monitoring behaviour differ by sociodemographic and drinking characteristics?

To explore the variation between participants randomised to the comparator group in self-reported adherence and behavioural characteristics (urges to drink; motivation to drink less; self-regulatory and self-monitoring behaviour) at 6-month follow-up, we reported descriptive statistics for these measures stratified by sociodemographic characteristics and baseline AUDIT scores (grouped into 8-15, 16-19 and 20-40) and COVID-19 measures. We ran sensitivity analyses where only those participants responding to 6-month follow-up were included in the analytic sample.

Self-reported adherence among participants in the comparator group stratified by sociodemographic and drinking characteristics is reported in Supplementary Table 2 (both with multiple imputation and complete cases). Among participants in the comparator group, urges to drink, motivation to drink less, self-regulatory and self-monitoring behaviour are reported in Supplementary Table 6 (using multiple imputation) and Supplementary Table 7 (using complete cases).

Supplementary Table 1: Descriptive statistics for potential mechanisms of action at baseline and 6-month follow-up, overall and stratified by group

| Mechanisms of action                                                      | Overall<br>(n=5,602) | Comparator group<br>(n=2,814) | Intervention group<br>(n=2,788) |
|---------------------------------------------------------------------------|----------------------|-------------------------------|---------------------------------|
| <b>Urges to drink (baseline)</b>                                          |                      |                               |                                 |
| Not at all                                                                | 510 (9.1%)           | 278 (9.9%)                    | 232 (8.3%)                      |
| Slight                                                                    | 863 (15%)            | 458 (16%)                     | 405 (15%)                       |
| Moderate                                                                  | 1,543 (28%)          | 757 (27%)                     | 786 (28%)                       |
| Strong                                                                    | 1,469 (26%)          | 718 (26%)                     | 751 (27%)                       |
| Very strong                                                               | 737 (13%)            | 363 (13%)                     | 374 (13%)                       |
| Extremely strong                                                          | 480 (8.6%)           | 240 (8.5%)                    | 240 (8.6%)                      |
| <b>Urges to drink (6-month follow-up, multiple imputation)</b>            |                      |                               |                                 |
| Not at all                                                                | 1310 (23.4%)         | 641 (22.8%)                   | 669 (24.0%)                     |
| Slight                                                                    | 2261 (40.4%)         | 1157 (41.1%)                  | 1104 (39.6%)                    |
| Moderate                                                                  | 1296 (23.1%)         | 637 (22.6%)                   | 659 (23.6%)                     |
| Strong                                                                    | 468 (8.4%)           | 232 (8.2%)                    | 236 (8.5%)                      |
| Very strong                                                               | 161 (2.9%)           | 86 (3.1%)                     | 75 (2.7%)                       |
| Extremely strong                                                          | 106 (1.9%)           | 61 (2.2%)                     | 45 (1.6%)                       |
| <b>Urges to drink (6-month follow-up, complete cases)</b>                 |                      |                               |                                 |
| Not at all                                                                | 1,278 (29%)          | 623 (28%)                     | 655 (31%)                       |
| Slight                                                                    | 1,482 (34%)          | 774 (35%)                     | 708 (33%)                       |
| Moderate                                                                  | 852 (20%)            | 423 (19%)                     | 429 (20%)                       |
| Strong                                                                    | 459 (11%)            | 229 (10%)                     | 230 (11%)                       |
| Very strong                                                               | 161 (3.7%)           | 86 (3.9%)                     | 75 (3.5%)                       |
| Extremely strong                                                          | 106 (2.4%)           | 61 (2.8%)                     | 45 (2.1%)                       |
| Unknown                                                                   | 1,264                | 618                           | 646                             |
| <b>Motivation to drink less (baseline)</b>                                |                      |                               |                                 |
| Really want to and intend to in next month                                | 2,769 (49%)          | 1,381 (49%)                   | 1,388 (50%)                     |
| Really want to and intend to in next 3 months                             | 634 (11%)            | 327 (12%)                     | 307 (11%)                       |
| Want to and hope to soon                                                  | 971 (17%)            | 493 (18%)                     | 478 (17%)                       |
| Really want to but don't know when I will                                 | 585 (10%)            | 281 (10.0%)                   | 304 (11%)                       |
| Want to but haven't thought about when                                    | 243 (4.3%)           | 123 (4.4%)                    | 120 (4.3%)                      |
| Think I should but don't really want to                                   | 385 (6.9%)           | 200 (7.1%)                    | 185 (6.6%)                      |
| I don't want to                                                           | 15 (0.3%)            | 9 (0.3%)                      | 6 (0.2%)                        |
| <b>Motivation to drink less (6-month follow-up, multiple imputation)</b>  |                      |                               |                                 |
| Really want to and intend to in next month                                | 1918 (34.2%)         | 965 (34.3%)                   | 953 (34.2%)                     |
| Really want to and intend to in next 3 months                             | 522 (9.3%)           | 259 (9.2%)                    | 263 (9.4%)                      |
| Want to and hope to soon                                                  | 1481 (26.4%)         | 744 (26.4%)                   | 737 (26.4%)                     |
| Really want to but don't know when I will                                 | 712 (12.7%)          | 356 (12.7%)                   | 356 (12.8%)                     |
| Want to but haven't thought about when                                    | 184 (3.3%)           | 97 (3.4%)                     | 87 (3.1%)                       |
| Think I should but don't really want to                                   | 391 (7.0%)           | 200 (7.1%)                    | 191 (6.9%)                      |
| I don't want to                                                           | 394 (7.0%)           | 193 (6.9%)                    | 201 (7.2%)                      |
| <b>Motivation to drink less (6-month follow-up, complete cases)</b>       |                      |                               |                                 |
| Really want to and intend to in next month                                | 1,918 (44%)          | 965 (44%)                     | 953 (45%)                       |
| Really want to and intend to in next 3 months                             | 460 (11%)            | 232 (11%)                     | 228 (11%)                       |
| Want to and hope to soon                                                  | 673 (16%)            | 344 (16%)                     | 329 (15%)                       |
| Really want to but don't know when I will                                 | 331 (7.6%)           | 173 (7.9%)                    | 158 (7.4%)                      |
| Want to but haven't thought about when                                    | 170 (3.9%)           | 89 (4.1%)                     | 81 (3.8%)                       |
| Think I should but don't really want to                                   | 391 (9.0%)           | 200 (9.1%)                    | 191 (8.9%)                      |
| I don't want to                                                           | 394 (9.1%)           | 193 (8.8%)                    | 201 (9.4%)                      |
| Unknown                                                                   | 1,265                | 618                           | 647                             |
| <b>Self-regulatory behaviour (baseline)</b>                               |                      |                               |                                 |
| Not at all                                                                | 177 (3.2%)           | 93 (3.3%)                     | 84 (3.0%)                       |
| Slightly                                                                  | 1,077 (19%)          | 557 (20%)                     | 520 (19%)                       |
| Moderately                                                                | 1,940 (35%)          | 963 (34%)                     | 977 (35%)                       |
| Very                                                                      | 1,806 (32%)          | 896 (32%)                     | 910 (33%)                       |
| Extremely                                                                 | 602 (11%)            | 305 (11%)                     | 297 (11%)                       |
| <b>Self-regulatory behaviour (6-month follow-up, multiple imputation)</b> |                      |                               |                                 |
| Not at all                                                                | 762 (13.6%)          | 398 (14.1%)                   | 364 (13.1%)                     |
| Slightly                                                                  | 2412 (43.1%)         | 1227 (43.6%)                  | 1185 (42.5%)                    |
| Moderately                                                                | 1605 (28.7%)         | 768 (27.3%)                   | 837 (30.0%)                     |
| Very                                                                      | 637 (11.4%)          | 320 (11.4%)                   | 317 (11.4%)                     |
| Extremely                                                                 | 186 (3.3%)           | 101 (3.6%)                    | 85 (3.0%)                       |
| <b>Self-regulatory behaviour (6-month follow-up, complete cases)</b>      |                      |                               |                                 |
| Not at all                                                                | 732 (17%)            | 378 (17%)                     | 354 (17%)                       |
| Slightly                                                                  | 1,657 (38%)          | 861 (39%)                     | 796 (37%)                       |
| Moderately                                                                | 1,127 (26%)          | 536 (24%)                     | 591 (28%)                       |
| Very                                                                      | 635 (15%)            | 320 (15%)                     | 315 (15%)                       |
| Extremely                                                                 | 186 (4.3%)           | 101 (4.6%)                    | 85 (4.0%)                       |
| Unknown                                                                   | 1,265                | 618                           | 647                             |
| <b>Self-monitoring behaviour (baseline)</b>                               |                      |                               |                                 |
| Never                                                                     | 2,758 (49%)          | 1,401 (50%)                   | 1,357 (49%)                     |
| Rarely                                                                    | 1,446 (26%)          | 727 (26%)                     | 719 (26%)                       |
| Sometimes                                                                 | 844 (15%)            | 400 (14%)                     | 444 (16%)                       |
| Very often                                                                | 366 (6.5%)           | 185 (6.6%)                    | 181 (6.5%)                      |

| Mechanisms of action                                               | Overall<br>(n=5,602) | Comparator group<br>(n=2,814) | Intervention group<br>(n=2,788) |
|--------------------------------------------------------------------|----------------------|-------------------------------|---------------------------------|
| Always                                                             | 188 (3.4%)           | 101 (3.6%)                    | 87 (3.1%)                       |
| Self-monitoring behaviour (6-month follow-up, multiple imputation) |                      |                               |                                 |
| Never                                                              | 1511 (27.0%)         | 874 (31.1%)                   | 637 (22.8%)                     |
| Rarely                                                             | 2138 (38.2%)         | 1101 (39.1%)                  | 1037 (37.2%)                    |
| Sometimes                                                          | 966 (17.2%)          | 433 (15.4%)                   | 533 (19.1%)                     |
| Very often                                                         | 540 (9.6%)           | 218 (7.7%)                    | 322 (11.5%)                     |
| Always                                                             | 447 (8.0%)           | 188 (6.7%)                    | 259 (9.3%)                      |
| Self-monitoring behaviour (6-month follow-up, complete cases)      |                      |                               |                                 |
| Never                                                              | 1,324 (31%)          | 776 (35%)                     | 548 (26%)                       |
| Rarely                                                             | 1,145 (26%)          | 621 (28%)                     | 524 (24%)                       |
| Sometimes                                                          | 881 (20%)            | 393 (18%)                     | 488 (23%)                       |
| Very often                                                         | 540 (12%)            | 218 (9.9%)                    | 322 (15%)                       |
| Always                                                             | 447 (10%)            | 188 (8.6%)                    | 259 (12%)                       |
| Unknown                                                            | 1,265                | 618                           | 647                             |

Supplementary Table 2: Self-reported adherence by intervention group stratified by sociodemographic and drinking characteristics

|                                     | Intervention group                                |             |                                                        |               | Comparator group                                  |             |                                              |               |
|-------------------------------------|---------------------------------------------------|-------------|--------------------------------------------------------|---------------|---------------------------------------------------|-------------|----------------------------------------------|---------------|
|                                     | Self-reported adherence, complete cases (n=2,262) |             | Self-reported adherence, multiple imputation (n=2,788) |               | Self-reported adherence, complete cases (n=2,345) |             | Self-reported adherence, multiple imputation |               |
|                                     | % No (n)                                          | % Yes (n)   | % No (n)                                               | % Yes (n)     | % No (n)                                          | % Yes (n)   | % No (n)                                     | % Yes (n)     |
| Age                                 |                                                   |             |                                                        |               |                                                   |             |                                              |               |
| 18-24                               | 32% (58)                                          | 68% (125)   | 42.1% (91)                                             | 57.9% (125)   | 38% (79)                                          | 62% (131)   | 47% (116)                                    | 53% (131)     |
| 25-34                               | 23% (137)                                         | 77% (471)   | 34.9% (253)                                            | 65.1% (471)   | 33% (191)                                         | 67% (396)   | 42.5% (294)                                  | 57.5% (397)   |
| 35-44                               | 17% (100)                                         | 83% (475)   | 34.8% (254)                                            | 65.2% (476)   | 28% (164)                                         | 72% (432)   | 41.7% (310)                                  | 58.3% (433)   |
| 45-54                               | 18% (88)                                          | 82% (402)   | 35.8% (225)                                            | 64.2% (404)   | 27% (135)                                         | 73% (357)   | 41.2% (251)                                  | 58.8% (358)   |
| 55-64                               | 22% (66)                                          | 78% (239)   | 34.9% (129)                                            | 65.1% (241)   | 23% (81)                                          | 77% (267)   | 33.2% (133)                                  | 66.8% (267)   |
| 65+                                 | 31% (31)                                          | 69% (70)    | 41.2% (49)                                             | 58.8% (70)    | 29% (33)                                          | 71% (79)    | 36.3% (45)                                   | 63.7% (79)    |
| Gender                              |                                                   |             |                                                        |               |                                                   |             |                                              |               |
| Female                              | 21% (270)                                         | 79% (1,044) | 35.5% (577)                                            | 64.5% (1,049) | 28% (358)                                         | 72% (931)   | 41% (648)                                    | 59% (933)     |
| Male                                | 22% (209)                                         | 78% (729)   | 36.6% (420)                                            | 63.4% (729)   | 31% (319)                                         | 69% (723)   | 40.5% (492)                                  | 59.5% (724)   |
| Other/<br>prefer not<br>to say      | 11% (1)                                           | 89% (8)     | 33.3% (4)                                              | 66.7% (8)     | 55% (6)                                           | 45% (5)     | 64.3% (9)                                    | 35.7% (5)     |
| Ethnicity                           |                                                   |             |                                                        |               |                                                   |             |                                              |               |
| White                               | 21% (449)                                         | 79% (1,678) | 35.9% (944)                                            | 64.1% (1,683) | 29% (636)                                         | 71% (1,584) | 40.6% (1,083)                                | 59.4% (1,586) |
| Ethnic<br>minority                  | 23% (29)                                          | 77% (97)    | 35.8% (54)                                             | 64.2% (97)    | 36% (42)                                          | 64% (74)    | 44.4% (60)                                   | 55.6% (75)    |
| Income                              |                                                   |             |                                                        |               |                                                   |             |                                              |               |
| £26,000 or<br>more                  | 20% (350)                                         | 80% (1,380) | 34.5% (728)                                            | 65.5% (1,381) | 29% (511)                                         | 71% (1,245) | 40% (831)                                    | 60% (1,248)   |
| Less than<br>£26,000                | 24% (130)                                         | 76% (402)   | 40.2% (273)                                            | 59.8% (406)   | 29% (172)                                         | 71% (417)   | 43.3% (318)                                  | 56.7% (417)   |
| Social grade                        |                                                   |             |                                                        |               |                                                   |             |                                              |               |
| ABC1                                | 20% (332)                                         | 80% (1,368) | 33.6% (696)                                            | 66.4% (1,373) | 28% (495)                                         | 72% (1,252) | 39.8% (828)                                  | 60.2% (1,254) |
| C2DE                                | 26% (148)                                         | 74% (414)   | 42.4% (305)                                            | 57.6% (414)   | 31% (188)                                         | 69% (410)   | 43.9% (321)                                  | 56.1% (411)   |
| Educational<br>qualification        |                                                   |             |                                                        |               |                                                   |             |                                              |               |
| Pre-16                              | 29% (23)                                          | 71% (57)    | 43.6% (44)                                             | 56.4% (57)    | 27% (27)                                          | 73% (73)    | 39.2% (47)                                   | 60.8% (73)    |
| Post-16                             | 21% (457)                                         | 79% (1,725) | 35.6% (957)                                            | 64.4% (1,730) | 29% (656)                                         | 71% (1,589) | 40.9% (1,102)                                | 59.1% (1,592) |
| AUDIT<br>category                   |                                                   |             |                                                        |               |                                                   |             |                                              |               |
| 8-15                                | 20% (100)                                         | 80% (403)   | 29.3% (167)                                            | 70.7% (403)   | 28% (135)                                         | 72% (350)   | 34.3% (183)                                  | 65.7% (350)   |
| 16-19                               | 19% (78)                                          | 81% (329)   | 31.6% (152)                                            | 68.4% (329)   | 28% (134)                                         | 72% (342)   | 38.3% (212)                                  | 61.7% (342)   |
| 20-40                               | 22% (302)                                         | 78% (1,050) | 39.3% (682)                                            | 60.7% (1,055) | 30% (414)                                         | 70% (970)   | 43.7% (754)                                  | 56.3% (973)   |
| Drinking<br>affected by<br>COVID-19 |                                                   |             |                                                        |               |                                                   |             |                                              |               |
| Yes                                 | 22% (232)                                         | 78% (821)   | 22% (232)                                              | 78% (821)     | 28% (300)                                         | 72% (770)   | 28% (300)                                    | 72% (770)     |
| No                                  | 20% (217)                                         | 80% (871)   | 19.9% (217)                                            | 80.1% (871)   | 29% (328)                                         | 71% (798)   | 29.1% (328)                                  | 70.9% (798)   |
| NA                                  | 26% (31)                                          | 74% (90)    | 85.3% (552)                                            | 14.7% (95)    | 37% (55)                                          | 63% (94)    | 84.3% (521)                                  | 15.7% (97)    |

Supplementary Table 3: Descriptive statistics for engagement measures among intervention group (n=2,788) over a 6-month period stratified by sociodemographic and drinking characteristics

|                                      | <b>Number of sessions<br/>(frequency),<br/>(n=2,788)</b> | <b>Time on app in<br/>minutes<br/>(amount),<br/>(n=2,788)</b> | <b>Number of days<br/>used (duration),<br/>(n=2,788)</b> | <b>Number of<br/>unique screens<br/>viewed (depth),<br/>(n=2,788)</b> |
|--------------------------------------|----------------------------------------------------------|---------------------------------------------------------------|----------------------------------------------------------|-----------------------------------------------------------------------|
|                                      | Mean (SD)                                                | Mean (SD)                                                     | Mean (SD)                                                | Mean (SD)                                                             |
| <b>Age</b>                           |                                                          |                                                               |                                                          |                                                                       |
| 18-24                                | 14.1 (37.91)                                             | 20.4 (60.04)                                                  | 11.0 (27.81)                                             | 11.0 (12.21)                                                          |
| 25-34                                | 23.8 (53.92)                                             | 34.3 (92.96)                                                  | 17.5 (35.86)                                             | 14.5 (13.64)                                                          |
| 35-44                                | 34.8 (68.59)                                             | 52.4 (114.57)                                                 | 24.7 (44.13)                                             | 18.4 (14.41)                                                          |
| 45-54                                | 40.9 (67.33)                                             | 61.5 (109.52)                                                 | 30.5 (46.83)                                             | 19.2 (15.11)                                                          |
| 55-64                                | 51.9 (77.18)                                             | 93.6 (155.85)                                                 | 38.9 (55.03)                                             | 21.2 (16.68)                                                          |
| 65+                                  | 41.3 (71.02)                                             | 82.6 (151.04)                                                 | 32.9 (51.53)                                             | 18.3 (17.30)                                                          |
| <b>Gender</b>                        |                                                          |                                                               |                                                          |                                                                       |
| Female                               | 35.6 (63.94)                                             | 58.1 (110.47)                                                 | 26.3 (43.77)                                             | 19.1 (15.19)                                                          |
| Male                                 | 31.8 (64.71)                                             | 47.6 (120.01)                                                 | 23.7 (44.96)                                             | 15.0 (14.22)                                                          |
| Other or prefer not to say           | 90.8 (164.5)                                             | 120.5 (218.02)                                                | 48.2 (73.38)                                             | 17.5 (18.84)                                                          |
| <b>Ethnicity</b>                     |                                                          |                                                               |                                                          |                                                                       |
| White                                | 34.7 (65.42)                                             | 54.7 (116.27)                                                 | 25.7 (44.67)                                             | 17.6 (14.93)                                                          |
| Ethnic minority                      | 27.9 (60.13)                                             | 44.8 (99.38)                                                  | 20.5 (41.3)                                              | 13.5 (14.66)                                                          |
| <b>Income</b>                        |                                                          |                                                               |                                                          |                                                                       |
| £26,000 or more                      | 35.6 (65.12)                                             | 54.9 (112.51)                                                 | 26.3 (44.6)                                              | 18.0 (14.74)                                                          |
| Less than £26,000                    | 30.1 (64.75)                                             | 51.4 (123.43)                                                 | 22.3 (43.84)                                             | 15.4 (15.4)                                                           |
| <b>Social grade</b>                  |                                                          |                                                               |                                                          |                                                                       |
| ABC1                                 | 35.6 (65.99)                                             | 54.5 (114.59)                                                 | 26.1 (44.52)                                             | 18.0 (14.62)                                                          |
| C2DE                                 | 30.2 (62.16)                                             | 52.6 (117.21)                                                 | 23.1 (44.17)                                             | 15.7 (15.74)                                                          |
| <b>Educational qualifications</b>    |                                                          |                                                               |                                                          |                                                                       |
| Pre-16                               | 18.0 (40.73)                                             | 32.3 (59.88)                                                  | 13.6 (28.58)                                             | 15.4 (14.37)                                                          |
| Post-16                              | 34.9 (65.72)                                             | 54.8 (116.75)                                                 | 25.8 (44.87)                                             | 17.5 (14.96)                                                          |
| <b>AUDIT category</b>                |                                                          |                                                               |                                                          |                                                                       |
| 8-15                                 | 38.3 (67.88)                                             | 54.0 (114.66)                                                 | 28.5 (47.2)                                              | 16.6 (14.67)                                                          |
| 16-19                                | 41.2 (75.04)                                             | 60.6 (128.84)                                                 | 30.3 (49.39)                                             | 17.9 (15.22)                                                          |
| 20-40                                | 31.0 (60.81)                                             | 52.2 (111.4)                                                  | 22.9 (41.83)                                             | 17.5 (14.96)                                                          |
| <b>Drinking affected by COVID-19</b> |                                                          |                                                               |                                                          |                                                                       |
| Yes                                  | 39.7 (73.39)                                             | 63.4 (140.84)                                                 | 28.2 (46.92)                                             | 18.1 (15.26)                                                          |
| No                                   | 42.3 (68.94)                                             | 64.3 (112.47)                                                 | 32.2 (49.74)                                             | 18.8 (15.39)                                                          |
| NA                                   | 11.9 (28.92)                                             | 21.5 (48.38)                                                  | 8.9 (20.25)                                              | 13.8 (12.98)                                                          |

Supplementary Table 4: Descriptive statistics for potential mechanisms of action among intervention group (n=2,788) at 6-month follow-up (using multiple imputation) stratified by sociodemographic and drinking characteristics

|                               | Urges to drink (n=2,788) |              |             |             |             |                  | Motivation to drink less (n=2,788)         |                                               |                          |                                           |                                        |                                         |                 | Self-regulatory behaviour (n=2,788) |              |             |             |           | Self-monitoring behaviour (n=2,788) |              |             |             |             |  |
|-------------------------------|--------------------------|--------------|-------------|-------------|-------------|------------------|--------------------------------------------|-----------------------------------------------|--------------------------|-------------------------------------------|----------------------------------------|-----------------------------------------|-----------------|-------------------------------------|--------------|-------------|-------------|-----------|-------------------------------------|--------------|-------------|-------------|-------------|--|
|                               | Not at all               | Slight       | Moderate    | Strong      | Very strong | Extremely strong | Really want to and intend to in next month | Really want to and intend to in next 3 months | Want to and hope to soon | Really want to but don't know when I will | Want to but haven't thought about when | Think I should but don't really want to | I don't want to | Not at all                          | Slightly     | Moderately  | Very        | Extremely | Never                               | Rarely       | Sometimes   | Very often  | Always      |  |
| Age                           |                          |              |             |             |             |                  |                                            |                                               |                          |                                           |                                        |                                         |                 |                                     |              |             |             |           |                                     |              |             |             |             |  |
| 18-24                         | 38.9% (84)               | 29.6% (64)   | 17.1% (37)  | 8.8% (19)   | 3.7% (8)    | 1.9% (4)         | 20.8% (45)                                 | 7.9% (17)                                     | 25.9% (56)               | 11.1% (24)                                | 7.4% (16)                              | 12% (26)                                | 14.8% (32)      | 27.8% (60)                          | 38% (82)     | 19.4% (42)  | 10.6% (23)  | 4.2% (9)  | 36.1% (78)                          | 38% (82)     | 15.3% (33)  | 7.9% (17)   | 2.8% (6)    |  |
| 25-34                         | 29.8% (216)              | 39.5% (286)  | 20.6% (149) | 5% (36)     | 3.2% (23)   | 1.9% (14)        | 29.6% (214)                                | 9.7% (70)                                     | 26.2% (190)              | 13.5% (98)                                | 5.2% (38)                              | 6.4% (46)                               | 9.4% (68)       | 16.7% (121)                         | 45.4% (329)  | 26.2% (190) | 7.9% (57)   | 3.7% (27) | 31.8% (230)                         | 38.3% (277)  | 17% (123)   | 6.2% (45)   | 6.8% (49)   |  |
| 35-44                         | 20.8% (152)              | 41.1% (300)  | 24.9% (182) | 9.2% (67)   | 2.5% (18)   | 1.5% (11)        | 35.3% (258)                                | 10.3% (75)                                    | 29% (212)                | 11.9% (87)                                | 2.2% (16)                              | 5.3% (39)                               | 5.9% (43)       | 9% (66)                             | 44.4% (324)  | 34.5% (252) | 9.9% (72)   | 2.2% (16) | 20.4% (149)                         | 41.1% (300)  | 17.8% (130) | 11.5% (84)  | 9.2% (67)   |  |
| 45-54                         | 19.2% (121)              | 43.1% (271)  | 25.1% (158) | 8.9% (56)   | 2.1% (13)   | 1.6% (10)        | 39% (245)                                  | 9.5% (60)                                     | 26.9% (169)              | 12.2% (77)                                | 0.8% (5)                               | 6.7% (42)                               | 4.9% (31)       | 10.7% (67)                          | 42% (264)    | 29.9% (188) | 13.8% (87)  | 3.7% (23) | 17.3% (109)                         | 35.6% (224)  | 23.5% (148) | 14.3% (90)  | 9.2% (58)   |  |
| 55-64                         | 18.9% (70)               | 36.5% (135)  | 28.9% (107) | 11.1% (41)  | 3.2% (12)   | 1.4% (5)         | 41.4% (153)                                | 8.9% (33)                                     | 23.2% (86)               | 13.2% (49)                                | 2.4% (9)                               | 7.3% (27)                               | 3.5% (13)       | 8.9% (33)                           | 37.6% (139)  | 34.6% (128) | 16.5% (61)  | 2.4% (9)  | 14.3% (53)                          | 31.9% (118)  | 18.6% (69)  | 18.6% (69)  | 16.5% (61)  |  |
| 65+                           | 21.8% (26)               | 40.3% (48)   | 21.8% (26)  | 14.3% (17)  | 0.8% (1)    | 0.8% (1)         | 31.9% (38)                                 | 6.7% (8)                                      | 20.2% (24)               | 17.6% (21)                                | 2.5% (3)                               | 9.2% (11)                               | 11.8% (14)      | 14.3% (17)                          | 39.5% (47)   | 31.1% (37)  | 14.3% (17)  | 0.8% (1)  | 15.1% (18)                          | 30.3% (36)   | 25.2% (30)  | 14.3% (17)  | 15.1% (18)  |  |
| Gender                        |                          |              |             |             |             |                  |                                            |                                               |                          |                                           |                                        |                                         |                 |                                     |              |             |             |           |                                     |              |             |             |             |  |
| Female                        | 25.8% (419)              | 41.5% (675)  | 22.3% (362) | 6.8% (111)  | 2.3% (37)   | 1.4% (22)        | 35.7% (580)                                | 9.3% (151)                                    | 25.6% (417)              | 11.9% (193)                               | 2.8% (45)                              | 6.8% (111)                              | 7.9% (129)      | 14% (227)                           | 44.5% (723)  | 28.4% (462) | 10.6% (172) | 2.6% (42) | 22.1% (359)                         | 36% (586)    | 20.3% (330) | 12.6% (205) | 9% (146)    |  |
| Male                          | 21.6% (248)              | 36.9% (424)  | 25.5% (293) | 10.7% (123) | 3.3% (38)   | 2% (23)          | 32.2% (370)                                | 9.6% (110)                                    | 27.6% (317)              | 14.1% (162)                               | 3.6% (41)                              | 6.9% (79)                               | 6.1% (70)       | 11.7% (134)                         | 39.9% (458)  | 32.3% (371) | 12.4% (143) | 3.7% (43) | 23.8% (274)                         | 38.9% (447)  | 17.5% (201) | 10.2% (117) | 9.6% (110)  |  |
| Other or prefer not to say    | 16.7% (2)                | 33.3% (4)    | 33.3% (4)   | 16.7% (2)   | 0% (0)      | 0% (0)           | 16.7% (2)                                  | 16.7% (2)                                     | 25% (3)                  | 8.3% (1)                                  | 8.3% (1)                               | 8.3% (1)                                | 16.7% (2)       | 25% (3)                             | 25% (3)      | 33.3% (4)   | 16.7% (2)   | 0% (0)    | 33.3% (4)                           | 33.3% (4)    | 8.3% (1)    | 0% (0)      | 25% (3)     |  |
| Ethnicity                     |                          |              |             |             |             |                  |                                            |                                               |                          |                                           |                                        |                                         |                 |                                     |              |             |             |           |                                     |              |             |             |             |  |
| White                         | 23.8% (625)              | 39.9% (1049) | 23.6% (619) | 8.4% (220)  | 2.7% (71)   | 1.6% (43)        | 34.7% (911)                                | 9.3% (243)                                    | 26.3% (692)              | 13% (342)                                 | 3% (79)                                | 6.7% (177)                              | 7% (183)        | 12.7% (333)                         | 42.7% (1121) | 29.9% (786) | 11.7% (307) | 3% (80)   | 23% (603)                           | 37.3% (979)  | 18.8% (494) | 11.7% (307) | 9.3% (244)  |  |
| Ethnic minority               | 27.2% (41)               | 33.8% (51)   | 24.5% (37)  | 10.6% (16)  | 2.6% (4)    | 1.3% (2)         | 25.8% (39)                                 | 12.6% (19)                                    | 27.2% (41)               | 9.3% (14)                                 | 4.6% (7)                               | 9.3% (14)                               | 11.3% (17)      | 20.5% (31)                          | 38.4% (58)   | 31.8% (48)  | 6% (9)      | 3.3% (5)  | 19.9% (30)                          | 36.4% (55)   | 23.8% (36)  | 9.9% (15)   | 9.9% (15)   |  |
| Income                        |                          |              |             |             |             |                  |                                            |                                               |                          |                                           |                                        |                                         |                 |                                     |              |             |             |           |                                     |              |             |             |             |  |
| £26,000 or more               | 24.6% (519)              | 40.4% (853)  | 23.2% (490) | 8.1% (171)  | 2.4% (50)   | 1.2% (26)        | 34.6% (730)                                | 9.7% (204)                                    | 25.7% (542)              | 12.5% (263)                               | 3% (63)                                | 7.3% (155)                              | 7.2% (152)      | 12.9% (272)                         | 43.4% (915)  | 30% (632)   | 11% (233)   | 2.7% (57) | 21.7% (458)                         | 37% (780)    | 19.7% (415) | 11.8% (249) | 9.8% (207)  |  |
| Less than £26,000             | 22.1% (150)              | 37% (251)    | 24.9% (169) | 9.6% (65)   | 3.7% (25)   | 2.8% (19)        | 32.8% (223)                                | 8.7% (59)                                     | 28.7% (195)              | 13.7% (93)                                | 3.5% (24)                              | 5.3% (36)                               | 7.2% (49)       | 13.5% (92)                          | 39.8% (270)  | 30.2% (205) | 12.4% (84)  | 4.1% (28) | 26.4% (179)                         | 37.8% (257)  | 17.4% (118) | 10.8% (73)  | 7.7% (52)   |  |
| Social grade                  |                          |              |             |             |             |                  |                                            |                                               |                          |                                           |                                        |                                         |                 |                                     |              |             |             |           |                                     |              |             |             |             |  |
| ABC1                          | 24.6% (510)              | 40.6% (840)  | 22.7% (469) | 8.3% (172)  | 2.7% (55)   | 1.1% (23)        | 34.5% (714)                                | 9.9% (204)                                    | 27.2% (563)              | 11.6% (240)                               | 2.9% (60)                              | 6.9% (143)                              | 7% (145)        | 12.9% (266)                         | 43.3% (896)  | 30.1% (622) | 11.1% (229) | 2.7% (56) | 21.4% (442)                         | 37.5% (776)  | 19.7% (407) | 11.8% (244) | 9.7% (200)  |  |
| C2DE                          | 22.1% (159)              | 36.7% (264)  | 26.4% (190) | 8.9% (64)   | 2.8% (20)   | 3.1% (22)        | 33.2% (239)                                | 8.2% (59)                                     | 24.2% (174)              | 16.1% (116)                               | 3.8% (27)                              | 6.7% (48)                               | 7.8% (56)       | 13.6% (98)                          | 40.2% (289)  | 29.9% (215) | 12.2% (88)  | 4% (29)   | 27.1% (195)                         | 36.3% (261)  | 17.5% (126) | 10.8% (78)  | 8.2% (59)   |  |
| Educational qualifications    |                          |              |             |             |             |                  |                                            |                                               |                          |                                           |                                        |                                         |                 |                                     |              |             |             |           |                                     |              |             |             |             |  |
| Pre-16                        | 28.7% (29)               | 33.7% (34)   | 24.8% (25)  | 7.9% (8)    | 3% (3)      | 2% (2)           | 33.7% (34)                                 | 5% (5)                                        | 25.7% (26)               | 11.9% (12)                                | 8.9% (9)                               | 8.9% (9)                                | 5.9% (6)        | 18.8% (19)                          | 44.6% (45)   | 20.8% (21)  | 11.9% (12)  | 4% (4)    | 37.6% (38)                          | 35.6% (36)   | 19.8% (20)  | 5% (5)      | 2% (2)      |  |
| Post-16                       | 23.8% (640)              | 39.8% (1070) | 23.6% (634) | 8.5% (228)  | 2.7% (72)   | 1.6% (43)        | 34.2% (919)                                | 9.6% (258)                                    | 26.5% (711)              | 12.8% (344)                               | 2.9% (78)                              | 6.8% (182)                              | 7.3% (195)      | 12.8% (345)                         | 42.4% (1140) | 30.4% (816) | 11.4% (305) | 3% (81)   | 22.3% (599)                         | 37.3% (1001) | 19.1% (513) | 11.8% (317) | 9.6% (257)  |  |
| AUDIT category                |                          |              |             |             |             |                  |                                            |                                               |                          |                                           |                                        |                                         |                 |                                     |              |             |             |           |                                     |              |             |             |             |  |
| 8-15                          | 36.1% (206)              | 44.7% (255)  | 14.6% (83)  | 4% (23)     | 0.5% (3)    | 0% (0)           | 26.7% (152)                                | 6.8% (39)                                     | 22.1% (126)              | 8.1% (46)                                 | 4.9% (28)                              | 10.4% (59)                              | 21.1% (120)     | 31.6% (180)                         | 51.9% (296)  | 14.2% (81)  | 1.8% (10)   | 0.5% (3)  | 20.5% (117)                         | 34.9% (199)  | 20.7% (118) | 12.5% (71)  | 11.4% (65)  |  |
| 16-19                         | 28.7% (138)              | 42.4% (204)  | 20% (96)    | 7.5% (36)   | 0.8% (4)    | 0.6% (3)         | 33.3% (160)                                | 11.6% (56)                                    | 25.4% (122)              | 11% (53)                                  | 3.3% (16)                              | 9.8% (47)                               | 5.6% (27)       | 15% (72)                            | 54.3% (261)  | 23.3% (112) | 6.9% (33)   | 0.6% (3)  | 21.8% (105)                         | 32.6% (157)  | 21% (101)   | 12.1% (58)  | 12.5% (60)  |  |
| 20-40                         | 18.7% (325)              | 37.1% (645)  | 27.6% (480) | 10.2% (177) | 3.9% (68)   | 2.4% (42)        | 36.9% (641)                                | 9.7% (168)                                    | 28.2% (489)              | 14.8% (257)                               | 2.5% (43)                              | 4.9% (85)                               | 3.1% (54)       | 6.4% (112)                          | 36.2% (628)  | 37.1% (644) | 15.8% (274) | 4.5% (79) | 23.9% (415)                         | 39.2% (681)  | 18.1% (314) | 11.1% (193) | 7.7% (134)  |  |
| Drinking affected by COVID-19 |                          |              |             |             |             |                  |                                            |                                               |                          |                                           |                                        |                                         |                 |                                     |              |             |             |           |                                     |              |             |             |             |  |
| Yes                           | 26.1% (275)              | 34.9% (367)  | 23% (242)   | 10.3% (108) | 3.4% (36)   | 2.4% (25)        | 46.8% (493)                                | 11.5% (121)                                   | 16.2% (171)              | 6.6% (70)                                 | 3.7% (39)                              | 9.2% (97)                               | 5.9% (62)       | 12% (126)                           | 40.4% (425)  | 29.7% (313) | 14.2% (150) | 3.7% (39) | 24.2% (255)                         | 25.3% (266)  | 25.5% (269) | 14.4% (152) | 10.5% (111) |  |
| No                            | 34.8% (379)              | 31.3% (341)  | 17.2% (187) | 11.2% (122) | 3.6% (39)   | 1.8% (20)        | 42.3% (460)                                | 9.8% (107)                                    | 14.5% (158)              | 8.1% (88)                                 | 3.9% (42)                              | 8.6% (94)                               | 12.8% (139)     | 21% (228)                           | 34.1% (371)  | 25.6% (278) | 15.2% (165) | 4.2% (46) | 26.9% (293)                         | 23.7% (258)  | 20.1% (219) | 15.6% (170) | 13.6% (148) |  |
| NA                            | 2.3% (15)                | 61.2% (396)  | 35.5% (230) | 0.9% (6)    | 0% (0)      | 0% (0)           | 0% (0)                                     | 5.4% (35)                                     | 63.1% (408)              | 30.6% (198)                               | 0.9% (6)                               | 0% (0)                                  | 0% (0)          | 1.5% (10)                           | 60.1% (389)  | 38% (246)   | 0.3% (2)    | 0% (0)    | 13.8% (89)                          | 79.3% (513)  | 7% (45)     | 0% (0)      | 0% (0)      |  |



Supplementary Table 6: Descriptive statistics for potential mechanisms of action among comparator group (n=2,814) at 6-month follow-up (using multiple imputation) stratified by sociodemographic and drinking characteristics

|                               | Urges to drink (n=2,814) |              |             |             |             |                  | Motivation to drink less (n=2,814)         |                                               |                          |                                           |                                        |                                         |                 | Self-regulatory behaviour (n=2,814) |              |             |             |           | Self-monitoring behaviour (n=2,814) |              |             |            |             |  |
|-------------------------------|--------------------------|--------------|-------------|-------------|-------------|------------------|--------------------------------------------|-----------------------------------------------|--------------------------|-------------------------------------------|----------------------------------------|-----------------------------------------|-----------------|-------------------------------------|--------------|-------------|-------------|-----------|-------------------------------------|--------------|-------------|------------|-------------|--|
|                               | Not at all               | Slight       | Moderate    | Strong      | Very strong | Extremely strong | Really want to and intend to in next month | Really want to and intend to in next 3 months | Want to and hope to soon | Really want to but don't know when I will | Want to but haven't thought about when | Think I should but don't really want to | I don't want to | Not at all                          | Slightly     | Moderately  | Very        | Extremely | Never                               | Rarely       | Sometimes   | Very often | Always      |  |
| Age                           |                          |              |             |             |             |                  |                                            |                                               |                          |                                           |                                        |                                         |                 |                                     |              |             |             |           |                                     |              |             |            |             |  |
| 18-24                         | 28.3% (70)               | 44.5% (110)  | 13.8% (34)  | 6.5% (16)   | 4.9% (12)   | 2% (5)           | 23.9% (59)                                 | 8.5% (21)                                     | 27.5% (68)               | 10.9% (27)                                | 6.9% (17)                              | 10.1% (25)                              | 12.1% (30)      | 21.9% (54)                          | 42.9% (106)  | 23.1% (57)  | 8.5% (21)   | 3.6% (9)  | 44.5% (110)                         | 37.7% (93)   | 11.3% (28)  | 4.5% (11)  | 2% (5)      |  |
| 25-34                         | 27.2% (188)              | 43.7% (302)  | 18.8% (130) | 5.8% (40)   | 2.3% (16)   | 2.2% (15)        | 27.5% (190)                                | 9.7% (67)                                     | 28.1% (194)              | 12.2% (84)                                | 5.5% (38)                              | 7.1% (49)                               | 10% (69)        | 17.1% (118)                         | 51.4% (355)  | 21.3% (147) | 7.8% (54)   | 2.5% (17) | 37.3% (258)                         | 41.8% (289)  | 12% (83)    | 4.5% (31)  | 4.3% (30)   |  |
| 35-44                         | 21.7% (161)              | 39% (290)    | 26% (193)   | 8.1% (60)   | 2.8% (21)   | 2.4% (18)        | 36.6% (272)                                | 8.5% (63)                                     | 28% (208)                | 12.8% (95)                                | 2.8% (21)                              | 5.8% (43)                               | 5.5% (41)       | 12.1% (90)                          | 41.9% (311)  | 30.8% (229) | 11.3% (84)  | 3.9% (29) | 31.6% (235)                         | 41.6% (309)  | 13.6% (101) | 7.5% (56)  | 5.7% (42)   |  |
| 45-54                         | 18.6% (113)              | 41.2% (251)  | 24.5% (149) | 10.2% (62)  | 3.3% (20)   | 2.3% (14)        | 37.8% (230)                                | 8.4% (51)                                     | 27.8% (169)              | 15.1% (92)                                | 2.5% (15)                              | 4.8% (29)                               | 3.8% (23)       | 9.7% (59)                           | 42.7% (260)  | 30.2% (184) | 13.3% (81)  | 4.1% (25) | 26.3% (160)                         | 40.6% (247)  | 17.4% (106) | 7.6% (46)  | 8.2% (50)   |  |
| 55-64                         | 20% (80)                 | 38.2% (153)  | 25.5% (102) | 11.5% (46)  | 3% (12)     | 1.8% (7)         | 42% (168)                                  | 11.8% (47)                                    | 19.8% (79)               | 10.2% (41)                                | 0.8% (3)                               | 10.5% (42)                              | 5% (20)         | 14.5% (58)                          | 36.2% (145)  | 28% (112)   | 17% (68)    | 4.2% (17) | 21.5% (86)                          | 32% (128)    | 21.2% (85)  | 14.2% (57) | 11% (44)    |  |
| 65+                           | 23.4% (29)               | 41.1% (51)   | 23.4% (29)  | 6.5% (8)    | 4% (5)      | 1.6% (2)         | 37.1% (46)                                 | 8.1% (10)                                     | 21% (26)                 | 13.7% (17)                                | 2.4% (3)                               | 9.7% (12)                               | 8.1% (10)       | 15.3% (19)                          | 40.3% (50)   | 31.5% (39)  | 9.7% (12)   | 3.2% (4)  | 20.2% (25)                          | 28.2% (35)   | 24.2% (30)  | 13.7% (17) | 13.7% (17)  |  |
| Gender                        |                          |              |             |             |             |                  |                                            |                                               |                          |                                           |                                        |                                         |                 |                                     |              |             |             |           |                                     |              |             |            |             |  |
| Female                        | 23.9% (378)              | 43.3% (684)  | 21.3% (336) | 7.2% (114)  | 2.2% (35)   | 2.2% (34)        | 35.3% (558)                                | 8.9% (140)                                    | 25% (396)                | 13.6% (215)                               | 3.4% (53)                              | 6.8% (108)                              | 7% (111)        | 13.7% (217)                         | 45.9% (726)  | 25.9% (409) | 10.9% (172) | 3.6% (57) | 30.1% (476)                         | 39% (616)    | 15.3% (242) | 8.5% (135) | 7.1% (112)  |  |
| Male                          | 21.6% (263)              | 38.5% (468)  | 24.3% (296) | 9.4% (114)  | 3.9% (48)   | 2.2% (27)        | 33.2% (404)                                | 9.7% (118)                                    | 28.2% (343)              | 11.2% (136)                               | 3.5% (43)                              | 7.5% (91)                               | 6.7% (81)       | 14.8% (180)                         | 40.9% (497)  | 29% (353)   | 11.8% (143) | 3.5% (43) | 32.5% (395)                         | 39.1% (475)  | 15.5% (189) | 6.7% (81)  | 6.2% (76)   |  |
| Other or prefer not to say    | 0% (0)                   | 28.6% (4)    | 28.6% (4)   | 21.4% (3)   | 21.4% (3)   | 0% (0)           | 21.4% (3)                                  | 7.1% (1)                                      | 14.3% (2)                | 35.7% (5)                                 | 7.1% (1)                               | 7.1% (1)                                | 7.1% (1)        | 7.1% (1)                            | 14.3% (2)    | 35.7% (5)   | 35.7% (5)   | 7.1% (1)  | 21.4% (3)                           | 57.1% (8)    | 7.1% (1)    | 14.3% (2)  | 0% (0)      |  |
| Ethnicity                     |                          |              |             |             |             |                  |                                            |                                               |                          |                                           |                                        |                                         |                 |                                     |              |             |             |           |                                     |              |             |            |             |  |
| White                         | 22.7% (606)              | 40.9% (1092) | 22.9% (612) | 8.3% (222)  | 3% (79)     | 2.2% (58)        | 34% (908)                                  | 9.1% (242)                                    | 26.5% (706)              | 12.9% (343)                               | 3.4% (91)                              | 7.3% (195)                              | 6.9% (184)      | 13.7% (366)                         | 43.7% (1167) | 27.6% (736) | 11.4% (303) | 3.6% (97) | 31% (828)                           | 38.9% (1037) | 15.5% (414) | 7.9% (211) | 6.7% (179)  |  |
| Ethnic minority               | 24.4% (33)               | 44.4% (60)   | 17% (23)    | 6.7% (9)    | 5.2% (7)    | 2.2% (3)         | 39.3% (53)                                 | 11.9% (16)                                    | 25.2% (34)               | 9.6% (13)                                 | 3.7% (5)                               | 3.7% (5)                                | 6.7% (9)        | 21.5% (29)                          | 41.5% (56)   | 22.2% (30)  | 12.6% (17)  | 2.2% (3)  | 33.3% (45)                          | 43.7% (59)   | 12.6% (17)  | 4.4% (6)   | 5.9% (8)    |  |
| Income                        |                          |              |             |             |             |                  |                                            |                                               |                          |                                           |                                        |                                         |                 |                                     |              |             |             |           |                                     |              |             |            |             |  |
| £26,000 or more               | 23.1% (481)              | 42.1% (875)  | 21.8% (454) | 8.5% (176)  | 2.8% (58)   | 1.7% (35)        | 34.4% (716)                                | 9.4% (196)                                    | 27.4% (569)              | 11.8% (245)                               | 3% (62)                                | 7.3% (151)                              | 6.7% (140)      | 13.9% (289)                         | 44.6% (927)  | 27.1% (564) | 11.1% (231) | 3.3% (68) | 30.6% (636)                         | 38.3% (796)  | 16.3% (338) | 8.2% (170) | 6.7% (139)  |  |
| Less than £26,000             | 21.8% (160)              | 38.4% (282)  | 24.9% (183) | 7.6% (56)   | 3.8% (28)   | 3.5% (26)        | 33.9% (249)                                | 8.6% (63)                                     | 23.8% (175)              | 15.1% (111)                               | 4.8% (35)                              | 6.7% (49)                               | 7.2% (53)       | 14.8% (109)                         | 40.8% (300)  | 27.8% (204) | 12.1% (89)  | 4.5% (33) | 32.4% (238)                         | 41.5% (305)  | 12.9% (95)  | 6.5% (48)  | 6.7% (49)   |  |
| Social grade                  |                          |              |             |             |             |                  |                                            |                                               |                          |                                           |                                        |                                         |                 |                                     |              |             |             |           |                                     |              |             |            |             |  |
| ABC1                          | 23.9% (498)              | 41.8% (871)  | 22% (458)   | 7.7% (160)  | 2.6% (54)   | 2% (41)          | 35.1% (731)                                | 9.3% (193)                                    | 26.8% (558)              | 11.9% (248)                               | 3.3% (69)                              | 6.8% (142)                              | 6.8% (141)      | 14.1% (293)                         | 45.1% (938)  | 26.4% (550) | 11% (229)   | 3.5% (72) | 29.5% (615)                         | 40.3% (839)  | 15.9% (330) | 8.2% (170) | 6.1% (128)  |  |
| C2DE                          | 19.5% (143)              | 39.1% (286)  | 24.5% (179) | 9.8% (72)   | 4.4% (32)   | 2.7% (20)        | 32% (234)                                  | 9% (66)                                       | 25.4% (186)              | 14.8% (108)                               | 3.8% (28)                              | 7.9% (58)                               | 7.1% (52)       | 14.3% (105)                         | 39.5% (289)  | 29.8% (218) | 12.4% (91)  | 4% (29)   | 35.4% (259)                         | 35.8% (262)  | 14.1% (103) | 6.6% (48)  | 8.2% (60)   |  |
| Educational qualifications    |                          |              |             |             |             |                  |                                            |                                               |                          |                                           |                                        |                                         |                 |                                     |              |             |             |           |                                     |              |             |            |             |  |
| Pre-16                        | 25.8% (31)               | 36.7% (44)   | 20% (24)    | 9.2% (11)   | 7.5% (9)    | 0.8% (1)         | 31.7% (38)                                 | 6.7% (8)                                      | 31.7% (38)               | 10% (12)                                  | 8.3% (10)                              | 8.3% (10)                               | 3.3% (4)        | 13.3% (16)                          | 47.5% (57)   | 23.3% (28)  | 11.7% (14)  | 4.2% (5)  | 35% (42)                            | 40.8% (49)   | 10% (12)    | 8.3% (10)  | 5.8% (7)    |  |
| Post-16                       | 22.6% (610)              | 41.3% (1113) | 22.8% (613) | 8.2% (221)  | 2.9% (77)   | 2.2% (60)        | 34.4% (927)                                | 9.3% (251)                                    | 26.2% (706)              | 12.8% (344)                               | 3.2% (87)                              | 7.1% (190)                              | 7% (189)        | 14.2% (382)                         | 43.4% (1170) | 27.5% (740) | 11.4% (306) | 3.6% (96) | 30.9% (832)                         | 39% (1052)   | 15.6% (421) | 7.7% (208) | 6.7% (181)  |  |
| AUDIT category                |                          |              |             |             |             |                  |                                            |                                               |                          |                                           |                                        |                                         |                 |                                     |              |             |             |           |                                     |              |             |            |             |  |
| 8-15                          | 32.5% (173)              | 51.2% (273)  | 11.3% (60)  | 4.3% (23)   | 0.6% (3)    | 0.2% (1)         | 28.1% (150)                                | 6.9% (37)                                     | 23.6% (126)              | 9.4% (50)                                 | 6.2% (33)                              | 9.8% (52)                               | 15.9% (85)      | 33.2% (177)                         | 53.5% (285)  | 9.6% (51)   | 2.8% (15)   | 0.9% (5)  | 30% (160)                           | 37.9% (202)  | 16.7% (89)  | 8.3% (44)  | 7.1% (38)   |  |
| 16-19                         | 28.9% (160)              | 45.7% (253)  | 18.6% (103) | 5.4% (30)   | 1.1% (6)    | 0.4% (2)         | 31% (172)                                  | 9.4% (52)                                     | 26.7% (148)              | 10.8% (60)                                | 4.7% (26)                              | 8.7% (48)                               | 8.7% (48)       | 18.8% (104)                         | 52.2% (289)  | 22.9% (127) | 5.4% (30)   | 0.7% (4)  | 31.4% (174)                         | 38.1% (211)  | 15% (83)    | 8.5% (47)  | 7% (39)     |  |
| 20-40                         | 17.8% (308)              | 36.5% (631)  | 27.4% (474) | 10.4% (179) | 4.5% (77)   | 3.4% (58)        | 37.2% (643)                                | 9.8% (170)                                    | 27.2% (470)              | 14.2% (246)                               | 2.2% (38)                              | 5.8% (100)                              | 3.5% (60)       | 6.8% (117)                          | 37.8% (653)  | 34.2% (590) | 15.9% (275) | 5.3% (92) | 31.3% (540)                         | 39.8% (688)  | 15.1% (261) | 7.4% (127) | 6.4% (111)  |  |
| Drinking affected by COVID-19 |                          |              |             |             |             |                  |                                            |                                               |                          |                                           |                                        |                                         |                 |                                     |              |             |             |           |                                     |              |             |            |             |  |
| Yes                           | 25.9% (277)              | 34.3% (367)  | 20.6% (220) | 11.7% (125) | 4.5% (48)   | 3.1% (33)        | 45.4% (486)                                | 10.9% (117)                                   | 16.8% (180)              | 8% (86)                                   | 4.5% (48)                              | 8.5% (91)                               | 5.8% (62)       | 12.9% (138)                         | 40.8% (437)  | 27% (289)   | 15% (160)   | 4.3% (46) | 36.2% (387)                         | 28.2% (302)  | 18.9% (202) | 9.9% (106) | 6.8% (73)   |  |
| No                            | 30.7% (346)              | 36.1% (407)  | 18% (203)   | 9.2% (104)  | 3.4% (38)   | 2.5% (28)        | 42.5% (479)                                | 10.2% (115)                                   | 14.6% (164)              | 7.7% (87)                                 | 3.6% (41)                              | 9.7% (109)                              | 11.6% (131)     | 21.3% (240)                         | 37.7% (424)  | 21.9% (247) | 14.2% (160) | 4.9% (55) | 34.5% (389)                         | 28.3% (319)  | 17% (191)   | 9.9% (112) | 10.2% (115) |  |
| NA                            | 2.9% (18)                | 62% (383)    | 34.6% (214) | 0.5% (3)    | 0% (0)      | 0% (0)           | 0% (0)                                     | 4.4% (27)                                     | 64.7% (400)              | 29.6% (183)                               | 1.3% (8)                               | 0% (0)                                  | 0% (0)          | 3.2% (20)                           | 59.2% (366)  | 37.5% (232) | 0% (0)      | 0% (0)    | 15.9% (98)                          | 77.7% (480)  | 6.5% (40)   | 0% (0)     | 0% (0)      |  |

Supplementary Table 7: Descriptive statistics for potential mechanisms of action among comparator group (n=2,196) at 6-month follow-up (using complete case) stratified by sociodemographic and drinking characteristics

|                               | Urges to drink (n=2,196) |           |           |            |             |                  | Motivation to drink less (n=2,196)         |                                               |                          |                                           |                                        |                                         |                 | Self-regulatory behaviour (n=2,196) |           |            |            |           | Self-monitoring behaviour (n=2,196) |           |           |            |            |  |
|-------------------------------|--------------------------|-----------|-----------|------------|-------------|------------------|--------------------------------------------|-----------------------------------------------|--------------------------|-------------------------------------------|----------------------------------------|-----------------------------------------|-----------------|-------------------------------------|-----------|------------|------------|-----------|-------------------------------------|-----------|-----------|------------|------------|--|
|                               | Not at all               | Slight    | Moderate  | Strong     | Very strong | Extremely strong | Really want to and intend to in next month | Really want to and intend to in next 3 months | Want to and hope to soon | Really want to but don't know when I will | Want to but haven't thought about when | Think I should but don't really want to | I don't want to | Not at all                          | Slightly  | Moderately | Very       | Extremely | Never                               | Rarely    | Sometimes | Very often | Always     |  |
| Age                           |                          |           |           |            |             |                  |                                            |                                               |                          |                                           |                                        |                                         |                 |                                     |           |            |            |           |                                     |           |           |            |            |  |
| 18-24                         | 35% (70)                 | 36% (71)  | 13% (25)  | 8.0% (16)  | 6.0% (12)   | 2.5% (5)         | 30% (59)                                   | 10% (20)                                      | 20% (39)                 | 5.5% (11)                                 | 7.5% (15)                              | 13% (25)                                | 15% (30)        | 26% (52)                            | 40% (79)  | 19% (38)   | 11% (21)   | 4.5% (9)  | 50% (99)                            | 29% (57)  | 14% (27)  | 5.5% (11)  | 2.5% (5)   |  |
| 25-34                         | 34% (183)                | 38% (204) | 16% (86)  | 7.0% (38)  | 3.0% (16)   | 2.8% (15)        | 35% (190)                                  | 12% (64)                                      | 19% (104)                | 5.5% (30)                                 | 6.6% (36)                              | 9.0% (49)                               | 13% (69)        | 20% (111)                           | 49% (263) | 18% (97)   | 10.0% (54) | 3.1% (17) | 41% (221)                           | 33% (180) | 15% (80)  | 5.7% (31)  | 5.5% (30)  |  |
| 35-44                         | 27% (153)                | 33% (186) | 22% (122) | 11% (59)   | 3.8% (21)   | 3.2% (18)        | 49% (272)                                  | 9.3% (52)                                     | 16% (89)                 | 7.3% (41)                                 | 3.8% (21)                              | 7.7% (43)                               | 7.3% (41)       | 15% (84)                            | 37% (209) | 27% (153)  | 15% (84)   | 5.2% (29) | 36% (200)                           | 30% (168) | 17% (93)  | 10% (56)   | 7.5% (42)  |  |
| 45-54                         | 24% (109)                | 35% (158) | 20% (93)  | 14% (62)   | 4.4% (20)   | 3.1% (14)        | 50% (230)                                  | 9.9% (45)                                     | 14% (64)                 | 11% (52)                                  | 2.9% (13)                              | 6.4% (29)                               | 5.0% (23)       | 12% (55)                            | 37% (169) | 28% (126)  | 18% (81)   | 5.5% (25) | 33% (149)                           | 26% (118) | 20% (93)  | 10% (46)   | 11% (50)   |  |
| 55-64                         | 23% (79)                 | 35% (118) | 22% (75)  | 14% (46)   | 3.6% (12)   | 2.1% (7)         | 50% (168)                                  | 12% (41)                                      | 10% (35)                 | 8.6% (29)                                 | 0.6% (2)                               | 12% (42)                                | 5.9% (20)       | 17% (57)                            | 31% (105) | 27% (90)   | 20% (68)   | 5.0% (17) | 25% (83)                            | 23% (79)  | 22% (74)  | 17% (57)   | 13% (44)   |  |
| 65+                           | 28% (29)                 | 36% (37)  | 21% (22)  | 7.8% (8)   | 4.9% (5)    | 1.9% (2)         | 45% (46)                                   | 9.7% (10)                                     | 13% (13)                 | 9.7% (10)                                 | 1.9% (2)                               | 12% (12)                                | 9.7% (10)       | 18% (19)                            | 35% (36)  | 31% (32)   | 12% (12)   | 3.9% (4)  | 23% (24)                            | 18% (19)  | 25% (26)  | 17% (17)   | 17% (17)   |  |
| Gender                        |                          |           |           |            |             |                  |                                            |                                               |                          |                                           |                                        |                                         |                 |                                     |           |            |            |           |                                     |           |           |            |            |  |
| Female                        | 30% (366)                | 37% (441) | 18% (214) | 9.5% (114) | 2.9% (35)   | 2.8% (34)        | 46% (558)                                  | 9.8% (118)                                    | 14% (165)                | 7.8% (94)                                 | 4.2% (50)                              | 9.0% (108)                              | 9.2% (111)      | 17% (204)                           | 42% (500) | 23% (271)  | 14% (172)  | 4.7% (57) | 35% (418)                           | 27% (325) | 18% (214) | 11% (135)  | 9.3% (112) |  |
| Male                          | 26% (257)                | 34% (330) | 21% (206) | 11% (112)  | 4.9% (48)   | 2.8% (27)        | 41% (404)                                  | 12% (113)                                     | 18% (175)                | 7.9% (77)                                 | 4.0% (39)                              | 9.3% (91)                               | 8.3% (81)       | 18% (173)                           | 37% (358) | 27% (263)  | 15% (143)  | 4.4% (43) | 36% (355)                           | 30% (291) | 18% (177) | 8.3% (81)  | 7.8% (76)  |  |
| Other or prefer not to say    | 0% (0)                   | 22% (2)   | 22% (2)   | 22% (2)    | 33% (3)     | 0% (0)           | 33% (3)                                    | 11% (1)                                       | 11% (1)                  | 22% (2)                                   | 0% (0)                                 | 11% (1)                                 | 11% (1)         | 11% (1)                             | 11% (1)   | 11% (1)    | 56% (5)    | 11% (1)   | 33% (3)                             | 33% (3)   | 11% (1)   | 22% (2)    | 0% (0)     |  |
| Ethnicity                     |                          |           |           |            |             |                  |                                            |                                               |                          |                                           |                                        |                                         |                 |                                     |           |            |            |           |                                     |           |           |            |            |  |
| White                         | 28% (588)                | 35% (727) | 20% (405) | 11% (219)  | 3.8% (79)   | 2.8% (58)        | 44% (908)                                  | 10% (216)                                     | 15% (321)                | 8.1% (169)                                | 4.0% (83)                              | 9.4% (195)                              | 8.9% (184)      | 17% (349)                           | 39% (814) | 25% (513)  | 15% (303)  | 4.7% (97) | 35% (734)                           | 28% (576) | 18% (376) | 10% (211)  | 8.6% (179) |  |
| Ethnic minority               | 30% (33)                 | 38% (42)  | 15% (17)  | 8.1% (9)   | 6.3% (7)    | 2.7% (3)         | 48% (53)                                   | 14% (15)                                      | 18% (20)                 | 3.6% (4)                                  | 4.5% (5)                               | 4.5% (5)                                | 8.1% (9)        | 24% (27)                            | 39% (43)  | 19% (21)   | 15% (17)   | 2.7% (3)  | 37% (41)                            | 37% (41)  | 14% (15)  | 5.4% (6)   | 7.2% (8)   |  |
| Income                        |                          |           |           |            |             |                  |                                            |                                               |                          |                                           |                                        |                                         |                 |                                     |           |            |            |           |                                     |           |           |            |            |  |
| £26,000 or more               | 28% (466)                | 36% (602) | 19% (318) | 11% (174)  | 3.5% (58)   | 2.1% (35)        | 43% (716)                                  | 11% (178)                                     | 17% (274)                | 8.2% (135)                                | 3.6% (59)                              | 9.1% (151)                              | 8.5% (140)      | 17% (275)                           | 40% (668) | 25% (411)  | 14% (231)  | 4.1% (68) | 34% (569)                           | 28% (470) | 18% (305) | 10% (170)  | 8.4% (139) |  |
| Less than £26,000             | 29% (157)                | 32% (172) | 19% (105) | 10% (55)   | 5.2% (28)   | 4.8% (26)        | 46% (249)                                  | 9.9% (54)                                     | 13% (70)                 | 7.0% (38)                                 | 5.5% (30)                              | 9.0% (49)                               | 9.8% (53)       | 19% (103)                           | 36% (193) | 23% (125)  | 16% (89)   | 6.1% (33) | 38% (207)                           | 28% (151) | 16% (88)  | 8.8% (48)  | 9.0% (49)  |  |
| Social grade                  |                          |           |           |            |             |                  |                                            |                                               |                          |                                           |                                        |                                         |                 |                                     |           |            |            |           |                                     |           |           |            |            |  |
| ABC1                          | 29% (481)                | 36% (588) | 19% (319) | 9.6% (158) | 3.3% (54)   | 2.5% (41)        | 45% (731)                                  | 11% (174)                                     | 16% (261)                | 7.6% (125)                                | 4.1% (67)                              | 8.7% (142)                              | 8.6% (141)      | 17% (280)                           | 41% (669) | 24% (391)  | 14% (229)  | 4.4% (72) | 34% (553)                           | 30% (492) | 18% (298) | 10% (170)  | 7.8% (128) |  |
| C2DE                          | 26% (142)                | 34% (186) | 19% (104) | 13% (71)   | 5.8% (32)   | 3.6% (20)        | 42% (234)                                  | 10% (58)                                      | 15% (83)                 | 8.6% (48)                                 | 4.0% (22)                              | 10% (58)                                | 9.4% (52)       | 18% (98)                            | 35% (192) | 26% (145)  | 16% (91)   | 5.2% (29) | 40% (223)                           | 23% (129) | 17% (95)  | 8.6% (48)  | 11% (60)   |  |
| Educational qualifications    |                          |           |           |            |             |                  |                                            |                                               |                          |                                           |                                        |                                         |                 |                                     |           |            |            |           |                                     |           |           |            |            |  |
| Pre-16                        | 34% (30)                 | 28% (25)  | 15% (13)  | 12% (11)   | 10% (9)     | 1.1% (1)         | 43% (38)                                   | 9.0% (8)                                      | 21% (19)                 | 1.1% (1)                                  | 10% (9)                                | 11% (10)                                | 4.5% (4)        | 18% (16)                            | 44% (39)  | 17% (15)   | 16% (14)   | 5.6% (5)  | 40% (36)                            | 27% (24)  | 13% (12)  | 11% (10)   | 7.9% (7)   |  |
| Post-16                       | 28% (593)                | 36% (749) | 19% (410) | 10% (218)  | 3.7% (77)   | 2.8% (60)        | 44% (927)                                  | 11% (224)                                     | 15% (325)                | 8.2% (172)                                | 3.8% (80)                              | 9.0% (190)                              | 9.0% (189)      | 17% (362)                           | 39% (822) | 25% (521)  | 15% (306)  | 4.6% (96) | 35% (740)                           | 28% (597) | 18% (381) | 9.9% (208) | 8.6% (181) |  |
| AUDIT category                |                          |           |           |            |             |                  |                                            |                                               |                          |                                           |                                        |                                         |                 |                                     |           |            |            |           |                                     |           |           |            |            |  |
| 8-15                          | 37% (169)                | 46% (212) | 12% (54)  | 5.0% (23)  | 0.6% (3)    | 0.2% (1)         | 32% (150)                                  | 7.8% (36)                                     | 18% (82)                 | 5.2% (24)                                 | 7.1% (33)                              | 11% (52)                                | 18% (85)        | 37% (170)                           | 50% (232) | 8.7% (40)  | 3.2% (15)  | 1.1% (5)  | 32% (146)                           | 32% (148) | 19% (86)  | 9.5% (44)  | 8.2% (38)  |  |
| 16-19                         | 35% (157)                | 41% (185) | 16% (72)  | 6.6% (30)  | 1.3% (6)    | 0.4% (2)         | 38% (172)                                  | 10% (47)                                      | 17% (79)                 | 7.7% (35)                                 | 5.1% (23)                              | 11% (48)                                | 11% (48)        | 22% (98)                            | 49% (220) | 22% (100)  | 6.6% (30)  | 0.9% (4)  | 34% (155)                           | 29% (132) | 17% (79)  | 10% (47)   | 8.6% (39)  |  |
| 20-40                         | 23% (297)                | 29% (377) | 23% (297) | 14% (176)  | 6.0% (77)   | 4.5% (58)        | 50% (643)                                  | 12% (149)                                     | 14% (183)                | 8.9% (114)                                | 2.6% (33)                              | 7.8% (100)                              | 4.7% (60)       | 8.6% (110)                          | 32% (409) | 31% (396)  | 21% (275)  | 7.2% (92) | 37% (475)                           | 27% (341) | 18% (228) | 9.9% (127) | 8.7% (111) |  |
| Drinking affected by COVID-19 |                          |           |           |            |             |                  |                                            |                                               |                          |                                           |                                        |                                         |                 |                                     |           |            |            |           |                                     |           |           |            |            |  |
| Yes                           | 26% (277)                | 34% (367) | 21% (220) | 12% (125)  | 4.5% (48)   | 3.1% (33)        | 45% (486)                                  | 11% (117)                                     | 17% (180)                | 8.0% (86)                                 | 4.5% (48)                              | 8.5% (91)                               | 5.8% (62)       | 13% (138)                           | 41% (437) | 27% (289)  | 15% (160)  | 4.3% (46) | 36% (387)                           | 28% (302) | 19% (202) | 9.9% (106) | 6.8% (73)  |  |
| No                            | 31% (346)                | 36% (407) | 18% (203) | 9.2% (104) | 3.4% (38)   | 2.5% (28)        | 43% (479)                                  | 10% (115)                                     | 15% (164)                | 7.7% (87)                                 | 3.6% (41)                              | 9.7% (109)                              | 12% (131)       | 21% (240)                           | 38% (424) | 22% (247)  | 14% (160)  | 4.9% (55) | 35% (389)                           | 28% (319) | 17% (191) | 9.9% (112) | 10% (115)  |  |
| NA                            | 0% (0)                   | 0% (0)    | 0% (0)    | 0% (0)     | 0% (0)      | 0% (0)           | 0% (0)                                     | 0% (0)                                        | 0% (0)                   | 0% (0)                                    | 0% (0)                                 | 0% (0)                                  | 0% (0)          | 0% (0)                              | 0% (0)    | 0% (0)     | 0% (0)     | 0% (0)    | 0% (0)                              | 0% (0)    | 0% (0)    | 0% (0)     | 0% (0)     |  |

*Supplementary Table 8: Sensitivity analysis with complete case analysis for self-reported adherence, urges to drink, self-regulatory and self-monitoring behaviour as mediators of the intervention on alcohol reduction*

|                           | ACME (95% CI)           | p-value | ADE (95% CI)            | p-value |
|---------------------------|-------------------------|---------|-------------------------|---------|
| Self-reported adherence   | -0.559 (-0.85 to -0.30) | <.001   | -1.155 (-2.93 to 0.59)  | .202    |
| Self-monitoring behaviour | -0.880 (-1.24 to -0.55) | <.001   | -0.835 (-2.57 to 0.99)  | .390    |
| Self-regulatory behaviour | 0.169 (-0.47 to 0.80)   | .612    | -1.943 (-3.58 to -0.18) | .026    |
| Urges to drink            | -0.580 (-1.27 to 0.08)  | .090    | -1.238 (-2.94 to 0.39)  | .122    |

*Supplementary Table 9: Sensitivity analysis with complete case analysis for engagement measures as mediators of the effect of self-reported adherence on alcohol reduction in the intervention group*

|                       | ACME (95% CI)          | p-value | ADE (95% CI)            | p-value |
|-----------------------|------------------------|---------|-------------------------|---------|
| Number of sessions    | 0.062 (-1.26 to 1.47)  | .962    | -7.76 (-11.57 to -3.75) | .002    |
| Time on app           | 0.480 (-0.84 to 1.79)  | .520    | -8.24 (-11.68 to -4.65) | <.001   |
| Number of days used   | -0.101 (-1.36 to 1.23) | .880    | -7.56 (-11.27 to -3.90) | <.001   |
| Unique screens viewed | 0.491 (-0.88 to 1.86)  | .450    | -8.16 (-12.17 to -4.24) | <.001   |
